# Supplementary material
Source: PubMed Central journal article supplement (PMC1859982)
Supplement: ahg0071-0018-fs1.pdf [file ahg0071-0018-fs1.pdf]

## Supplementary Material

**Supplementary Figure S1** DNA sequence alignments of human, chimpanzee, gorilla and orangutan *FSHB* gene. Location of exons, identified SNPs and fixed differences among species causing non-synonymous changes are indicated

human 1 AAAAGAAAAGAATTTTATTTTTCTTTTCAGACAAAAATAGACTTTAAAATAATAATGGAA  
chimpanzee 1 .....  
gorilla 1 .....  
orangutan 1 .....

human 61 GAACAAATATGATGATCACAATTATCAGAGTAATTACTTTATGACAGTCAGCAATAAGAT  
chimpanzee 61 .....  
gorilla 61 .....T.....  
orangutan 61 .....C.....C.....

**rs 550312**

human 121 TCTAATCTTTAAATATTCCTCTGCTGAAATCATTATATTGGAGTTTTGATCTATAATATA  
chimpanzee 121 .....  
gorilla 121 .....  
orangutan 121 .....C.....  


human 181 TTCCCACCCTGACCCAAAAATTGAAGAAGGACAAGGAAAAATGTT-GTTCCAAGAAACAA  
chimpanzee 181 .....-.....  
gorilla 181 .....-.....  
orangutan 181 .....A.....A...G....T.....

**rs 611246**

human 240 AGATGTAAGTAAAAGGCATAAGGAAGGAAAAAAATCTTTTGAAGCAAAATGTGATTGAG  
chimpanzee 240 .....  
gorilla 237 ...C.....  
orangutan 241 ...C.....C.....  


human 300 GAGGATGAGCAGACCAATTATTTTTGGTTTTGGTCAGCTTACATAATGATTATCGTTCTTT  
chimpanzee 300 .....  
gorilla 297 .....T.....  
orangutan 300 .....

**exon 2**

human 360 GGTTTCTCAGTTTCTAGTGGGCTTCATTGTTTGCTTCCAGACCAGGATGAAGACACTCC  
chimpanzee 360 .....  
gorilla 357 .....  
orangutan 360 .....G.....  


**Leu (L)->Val (V)**

human 420 AGTTTTTCTTCCTTTTCTGTTGCTGGAAAGCAATCTGCTGCAATAGCTGTGAGCTGACCA  
chimpanzee 420 .....  
gorilla 417 .....  
orangutan 420 .....

human 480 ACATCACCATTGCAATAGAGAAAGAAGAATGTCGTTTCTGCATAAGCATCAACACCACTT  
chimpanzee 480 .....  
gorilla 477 .....  
orangutan 480 .....G.....

**rs 609896**

human 540 GGTGTGCTGGCTACTGCTACACCAGGCTAGGTACCATGTTTGTCTGGAAGCAAGGGTCT  
chimpanzee 540 .....C.....  
gorilla 537 .....  
orangutan 540 .....G.....  
  


**Tyr (Y)->His (H)**

human 600 GAAGGTCTGTATTAGGCCGGTTTTATTAGTTTCTACTTTATCAATATTTTATGTATTCTA  
chimpanzee 600 .....  
gorilla 597 .....C.....  
orangutan 600 .....

|            |      |                                                              |
|------------|------|--------------------------------------------------------------|
| human      | 660  | AGTAACAGCCATGAGTCCTTTAGCCAAGACTGTCTGTGTTGTGATTGGGGTTAATGACCA |
| chimpanzee | 660  | .....A...C.....                                              |
| gorilla    | 657  | .....                                                        |
| orangutan  | 660  | .....C.....A.....                                            |
| human      | 720  | CGATATCACTTAGATGTTTGGGCTTGGATTTGATTTGGGTAAATTTAGGAAAGCCTCAGA |
| chimpanzee | 720  | T.....                                                       |
| gorilla    | 717  | T.....                                                       |
| orangutan  | 720  | T.....G                                                      |
| human      | 780  | TTTAATCTGATCAATTTGGTACTAGTCCAACCTTGCATCTACAGGGAAAAAGTATTTCTA |
| chimpanzee | 777  | .....T.....                                                  |
| gorilla    | 777  | .....T.....A.....                                            |
| orangutan  | 780  | ...C.....A.....T.....A.....                                  |
| human      | 840  | TGTTACGTTTTTACACATAGAGAGATAAACATGGAAACATACATATATTTAATCATAAAG |
| chimpanzee | 837  | .....T.....                                                  |
| gorilla    | 837  | .....T.....                                                  |
| orangutan  | 840  | .....T.....T.....C.....                                      |
| human      | 900  | GACCTATAATATTCTCATAAAGGCAATTTCTTTAACTGACACTACATCTTTGACACAAAA |
| chimpanzee | 897  | .....C.....                                                  |
| gorilla    | 897  | .....                                                        |
| orangutan  | 900  | .....C.G.....TG.....                                         |
| human      | 960  | ATCACACCAAAATATGTCTCCAAGTCACATAAAAAACATAGACAGCCACTTAAAAAATTG |
| chimpanzee | 957  | .....C.....T.....                                            |
| gorilla    | 957  | .....C.....                                                  |
| orangutan  | 960  | ...T.....C.....C.....                                        |
| human      | 1019 | TCTTCCTGGCCCTACTAAATACAAATGCCAAAAAACAGCCTGAGAACACAATCAATTCTT |
| chimpanzee | 1017 | .....                                                        |
| gorilla    | 1017 | .....                                                        |
| orangutan  | 1020 | .....C...T.....                                              |
| human      | 1079 | GCAGACTGTTAGAACAAAAATGAATCAGCAAACCCACTCCCTTCGTTATAGCATTGAGAA |
| chimpanzee | 1077 | .....A.....                                                  |
| gorilla    | 1077 | .....                                                        |
| orangutan  | 1080 | .....A.....                                                  |
| human      | 1139 | AACCAAGACATAGAGGCATCAGTTGCTAGTCTGTGTTTGCAGTTTCCTTGCATTAATACA |
| chimpanzee | 1137 | .....                                                        |
| gorilla    | 1137 | .....                                                        |
| orangutan  | 1140 | .....                                                        |
|            |      | <b>rs 580646</b>                                             |
| human      | 1199 | AGTAGAGAAATAGTTTCCATGGTGTCTCTTTTTTCTCTGCAGCACCCCTAATTATCTAT  |
| chimpanzee | 1197 | .....                                                        |
| gorilla    | 1197 | .....A.....                                                  |
| orangutan  | 1200 | ...A.....                                                    |
| human      | 1259 | GCAGAATTTTATTCTATAAACTAAAATTGAAAATGGCAACTTTTTAAATGAACGATACTT |
| chimpanzee | 1257 | .....T...-.....                                              |
| gorilla    | 1257 | .....C.....                                                  |
| orangutan  | 1260 | .....G.....C.....T.....                                      |

human 1319 TATTTGACGGTAAATGAGTTTGATCAAACCTCCATTTATTACACAATTTATTGCACCTTCT  
chimpanzee 1316 .....  
gorilla 1317 .....  
orangutan 1320 C.....T.....

human 1379 TGGGATATACATTTGGTAGGATGATATTAATAAATAAACAGAAGCCCCAATTTCTCTACGCA  
chimpanzee 1376 .....G.....  
gorilla 1377 .....C.....T.....  
orangutan 1380 .....C.....C.....T..T..

human 1439 GTATAAATAATTTTTCCACTGGAAAGTGCTACTACAAATAATTTCTACCTGGATTAAAAA  
chimpanzee 1436 .....G.....C.....  
gorilla 1437 A.....A.....  
orangutan 1440 .C.....G.....C.....

**rs 595496**

human 1499 TTCTTATA**T**GCAAACCTGCATATCCTTTGAAACTAGGAACCCTGCAAAGTATACAGCTTTC  
chimpanzee 1496 .....A.....  
gorilla 1497 .....T.....T  
orangutan 1500 .....C..T.....G.....T

human 1559 AAGGGAGAAAAATGTCCACAAGGAGTTGGAATATTTAAATCTTATGTTAGCCTTAGCAA  
chimpanzee 1556 .....C.....  
gorilla 1557 .....  
orangutan 1560 ....C.....G.....

**rs 594982**

human 1619 ACATGTTAACTTAAGCATTAA**C**ATTTAAAATTATATATTTTTGACCTTTTATAAATAC-T  
chimpanzee 1616 .....A.  
gorilla 1617 .....T.....A.  
orangutan 1620 .....G.....G.....A.

human 1678 CAGGGCAGTGTATTTTTAAATATTTTTCTGAGACATTGGATATCTTTGTTTATGGTTT-  
chimpanzee 1676 .....-  
gorilla 1677 .....G.....C.....-  
orangutan 1680 .....G.....T.....A.....A

human 1737 ----GTTATTAATACAGCTTTCAATTAATATGAAAAGTCAACTTAAAATCCTGTCATGT  
chimpanzee 1735 ----.C.....T.....  
gorilla 1736 ----.C.....T.....  
orangutan 1740 AGTT..C.....GT.....G.....T.....

human 1793 TTTTCATCATTTTTCTATGCTAAAATTCAAAGTTCCTTTATATTTTGAAAAATAGTTAAT  
chimpanzee 1791 .....C.....  
gorilla 1792 .....A....C  
orangutan 1800 .....A.....A.....

human 1853 ATTTTGATATAGCCATAGGAAGTAAGAAAAGAAATTACTTGTATTTTCTGGAAGATTTCA  
chimpanzee 1851 .....G.....  
gorilla 1852 .....T.....G.....G  
orangutan 1860 .....G.....T.....G

human 1913 AGAACAATTTAGAAATGTAAATAGCATATAGGTCATTTATGAGGTCATGTTTTAATGGGT  
chimpanzee 1911 .....  
gorilla 1912 .....C.....  
orangutan 1920 .....C.....

|            |      |                                                                |
|------------|------|----------------------------------------------------------------|
| human      | 1973 | AAATGTTAGAGCAAGCAGTATTCAATTTCTGTCTCATTTTACTAAGCTAAATAGGAACT    |
| chimpanzee | 1971 | .....G.....                                                    |
| gorilla    | 1972 | .....                                                          |
| orangutan  | 1980 | .....                                                          |
|            |      | <b>exon 3</b>                                                  |
| human      | 2033 | TCCACAATACCATAACCTAACTCTCTTCTTAAACTCCTCAGGATCTGGTGTATAAGGACC   |
| chimpanzee | 2031 | .....                                                          |
| gorilla    | 2032 | .....C.....                                                    |
| orangutan  | 2040 | .....G.....T.....                                              |
|            |      | <b>rs 6169</b>                                                 |
| human      | 2093 | CAGCCAGGCCCAAATCCAGAAAACATGTACCTTCAAGGAACTGGTATACGAAACAGTGA    |
| chimpanzee | 2091 | .....C..... <b>F</b> .....                                     |
| gorilla    | 2092 | .....C..... <b>F</b> .....                                     |
| orangutan  | 2100 | .....C..... <b>F</b> .....                                     |
|            |      |                                                                |
| human      | 2153 | GAGTGCCCGGCTGTGCTCACCATGCAGATTCTTGTATAACATACCCAGTGGCCACCCAGT   |
| chimpanzee | 2151 | .....T.....                                                    |
| gorilla    | 2152 | .....                                                          |
| orangutan  | 2160 | .....                                                          |
| human      | 2213 | GTCACTGTGGCAAGTGTGACAGCGACAGCACTGATTGTACTGTGCGAGGCCTGGGGCCCA   |
| chimpanzee | 2211 | .....C.....A.....                                              |
| gorilla    | 2212 | .....C.....C.....                                              |
| orangutan  | 2220 | .....C.....C.....                                              |
| human      | 2273 | GCTACTGCTCCTTTGGTGAAATGAAAGAATAAAGATCAGTGGACATTTAGGCCACATAC    |
| chimpanzee | 2271 | .....                                                          |
| gorilla    | 2272 | .....                                                          |
| orangutan  | 2280 | .....C.....                                                    |
| human      | 2333 | CCTTGTCTGAAGGACCAAGATATTCAAAAAGTCTGTGTGTGTGCAATGTGCCAGGGGA     |
| chimpanzee | 2331 | .....                                                          |
| gorilla    | 2332 | .....T..                                                       |
| orangutan  | 2340 | .....G.....A.....T..                                           |
| human      | 2393 | CAAACCACTGGATCAGGGGATTCAGACTCTACTGATCCCTGGTCTACTGGCAGAGGGAAC   |
| chimpanzee | 2391 | .....--.....                                                   |
| gorilla    | 2392 | .....                                                          |
| orangutan  | 2400 | .....T.....                                                    |
| human      | 2453 | TCTGGAATTGAGAGTGTGGGGCCAGGACTCCATCATGATTGAGCTCTATATTCCTAG      |
| chimpanzee | 2449 | .....A.....                                                    |
| gorilla    | 2452 | .....                                                          |
| orangutan  | 2460 | .....                                                          |
| human      | 2513 | GTCTGATTTTCATAAGGTTTATTTCAGTCTTAACTCACAGACTTGTGCCTGGTTTCTTCTTT |
| chimpanzee | 2509 | .....A.....                                                    |
| gorilla    | 2512 | .....C..                                                       |
| orangutan  | 2520 | .....A.....                                                    |
| human      | 2573 | AAAAATCTTAGAAATCTTCTCAGGCAATGCCTCTCTCTTAGGGGGAAACATAAGCCTAGA   |
| chimpanzee | 2569 | .....                                                          |
| gorilla    | 2572 | .....AA.....G.....                                             |
| orangutan  | 2580 | .....A.....T.....                                              |

|            |      |                                                              |
|------------|------|--------------------------------------------------------------|
| human      | 2633 | AGGAGGAAGCAGTAATGGGAGTGAGTGAAAGAATAACTGCAGCAGTCTTCTGGTAGACT  |
| chimpanzee | 2629 | .....                                                        |
| gorilla    | 2632 | .....C.....                                                  |
| orangutan  | 2640 | .....G.....                                                  |
| human      | 2693 | CTTGGGCCCTCTAGAGCAAGGTCAGCATCTTCAGCATTGTAGCGTCAATGCCTAGCACTC |
| chimpanzee | 2689 | .....                                                        |
| gorilla    | 2692 | .....C.....                                                  |
| orangutan  | 2700 | .....C.....                                                  |
| human      | 2753 | TGCCTGGAACCTTAGAAACACAACAATGGCTTCTTTAGATCAGAA                |
| chimpanzee | 2749 | .....                                                        |
| gorilla    | 2752 | .....---                                                     |
| orangutan  | 2760 | .....                                                        |
